# Supplementary material for: Fluorescence activation mechanism and imaging of drug permeation with new sensors for smoking-cessation ligands
Source: eLife. 2022 Jan 4;11:e74648. doi: 10.7554/eLife.74648 (PMC8820738; doi:10.7554/eLife.74648)
Supplement: Supplementary file 1. [file elife-74648-supp1.xlsx]

## Sheet: Sheet1
	iNicSnFR 3a + varenicline	iNicSnFR 3a + nicotine	iNicSnFR 3a apo
Beamline	SSRL 12-2	SSRL 12-2	ALS 5.0.2
Wavelength (Å)	1.771	0.9795	0.9848
Resolution range (Å)	37.82 - 3.203 (3.318 - 3.203)	38.99 - 2.95 (3.055 - 2.95)	40.39 - 2.5 (2.589 - 2.5)
Space group	P 61	P 61	P 1
Unit cell (Å, º)	190.37 190.37 49.74 90 90 120	192.28 192.28 49.66 90 90 120	81.19 86.87 91.83 75.72 85.56 85.28
Total reflections	336,082 (32,367)	450,604 (46,571)	283,541 (27,520)
Unique reflections	17,371 (1,669)	22,578 (2,159)	81,831 (8,190)
Multiplicity	19.3 (18.7)	20.0 (20.7)	3.5 (3.4)
Completeness (%)	99.51 (96.41)	99.49 (95.87)	98.53 (97.83)
Mean I/sigma(I)	17.74 (1.07)	21.00 (0.85)	10.69 (1.72)
Wilson B-factor	113.35	97.03	40.02
R-merge	0.1365 (2.592)	0.133 (3.88)	0.0827 (0.601)
R-meas	0.1402 (2.664)	0.136 (3.98)	0.0985 (0.716)
R-pim	0.0318 (0.611)	0.0305 (0.871)	0.0527 (0.384)
CC1/2	0.999 (0.666)	1 (0.376)	0.995 (0.665)
CC*	1.000 (0.894)	1 (0.739)	0.999 (0.894)
Reflections used in refinement	17,300 (1,667)	22,480 (2,159)	82,497 (8,190)
Reflections used for R-free	1,723 (163)	1,118 (105)	2,003 (185)
R-work	0.187 (0.318)	0.184 (0.328)	0.232 (0.308)
R-free	0.219 (0.382)	0.231 (0.378)	0.274 (0.340)
CC(work)	0.955 (0.736)	0.959 (0.612)	0.908 (0.724)
CC(free)	0.974 (0.543)	0.942 (0.689)	0.889 (0.586)
Number of non-hydrogen atoms	4069	4068	16649
macromolecules	4025	4046	16049
ligands	44	22	88
solvent	-	-	512
Protein residues	511	511	2034
RMS(bonds) (Å)	0.003	0.006	0.004
RMS(angles) (º)	0.6	0.79	0.81
Ramachandran favored (%)	98.21	98.02	98.06
Ramachandran allowed (%)	1.79	1.98	1.69
Ramachandran outliers (%)	0	0	0.25
Rotamer outliers (%)	0	1.13	1.88
Clashscore	7.4	5.18	9.66
Average B-factor	118.18	94.84	39.86
macromolecules	118.06	94.99	40.03
ligands	128.96	66.12	31.05
solvent	-	-	36.31
PDB ID	7s7t	7s7u	7s7v
*Statistics for the highest-resolution shell are shown in parentheses.
