# Supplementary material for: Fluorescence activation mechanism and imaging of drug permeation with new sensors for smoking-cessation ligands
Source: eLife. 2022 Jan 4;11:e74648. doi: 10.7554/eLife.74648 (PMC8820738; doi:10.7554/eLife.74648)
Supplement: Supplementary file 2. [file elife-74648-supp2.xlsx]

## Sheet: Sheet1
	iDianiSnFR			iCytSnFR			iCyt_F_SnFR			iCyt_BrEt_SnFR
µM	t1	t2	R2	t1	t2	R2	t1	t2	R2	t1	t2	R2
500	0.0067 ± <0.0001	0.18 ± <0.01	0.986	0.027 ± <0.001	-	0.999	0.021 ± <0.001	0.32 ± <0.01	0.999	0.02 ± <0.01	-	0.992
250	0.0062 ± <0.0001	0.22 ± <0.01	0.989	0.039 ± <0.001	-	0.999	0.027 ± <0.001	0.34 ± <0.01	0.999	0.023 ± <0.001	-	0.994
125	0.0061 ± <0.0001	0.34 ± 0.01	0.991	0.063 ± <0.001	-	0.999	0.038 ± <0.001	0.42 ± <0.01	>0.999	0.03 ± <0.01	-	0.997
62.5	0.0068 ± <0.0001	0.39 ± 0.01	0.995	0.11 ± <0.01	-	>0.999	0.066 ± <0.001	0.63 ± <0.01	>0.999	0.045 ± <0.001	-	0.998
15.625	0.012 ± <0.0001	0.88 ± 0.09	0.997	0.34 ± <0.01	-	>0.999	0.20 ± <0.01	1.7 ± <0.1	>0.999	0.12 ± <0.001	-	>0.999
3.9	0.025 ± <0.001	0.81 ± 0.10	0.996	0.80 ± <0.01	-	>0.999	0.066 ± 0.014	0.99 ± 0.02	0.999	0.38 ± <0.001	-	>0.999
0.975	0.034 ± <0.001	0.44 ± 0.09	0.976	1.3 ± <0.1	-	0.994	0.14 ± 0.05	5.3 ± 4.2	0.987	0.89 ± <0.01	-	>0.999
0.245	-	-	-	0.97 ± 0.06	-	0.947	-	-	-	1.4 ± <0.1	-	0.995
